# Supplementary material for: The Differential Contribution of the Innate Immune System to a Good Pathological Response in the Breast and Axillary Lymph Nodes Induced by Neoadjuvant Chemotherapy in Women with Large and Locally Advanced Breast Cancers
Source: Hindawi journal article supplement (doi:10.1155/2017/1049023), 2017-01-01
Supplement: f1 [file 1049023.f1.pdf]

**Table A.** Patient and Tumour Characteristics, Responses to Neoadjuvant Chemotherapy (n=33)

| Patient No. | Age | BMI <sup>(1)</sup><br>(kg/m <sup>2</sup> ) | Menopausal Status <sup>(2)</sup> | Nodal Status (Clinical Assessment) | Tumour Size (mm) | Tumour Type | Histological Grade <sup>(3)</sup> | ER Status <sup>(4)</sup> | HER-2 Status <sup>(5)</sup> | NAC Regimen <sup>(6)</sup> | Clinical Response <sup>(7)</sup> | Pathological Response (Breast) <sup>(8)</sup> | Pathological Response (Axilla: Nodal Metastasis) <sup>(9)</sup> | Recurrence <sup>(10)</sup> | Death <sup>(10)</sup> |
|-------------|-----|--------------------------------------------|----------------------------------|------------------------------------|------------------|-------------|-----------------------------------|--------------------------|-----------------------------|----------------------------|----------------------------------|-----------------------------------------------|-----------------------------------------------------------------|----------------------------|-----------------------|
| 5           | 40  | 21.90                                      | pre                              | +ve                                | 40x50            | ductal      | 3                                 | +ve                      | -ve                         | 4AC-4TX                    | responder                        | grade 5                                       | grade 3                                                         | no                         | no                    |
| 7           | 61  | 33.29                                      | post                             | -ve                                | 70x60            | ductal      | 3                                 | -ve                      | +ve                         | 4AC-4T                     | responder                        | grade 5                                       | NA                                                              | no                         | no                    |
| 9           | 51  | 21.87                                      | pre                              | -ve                                | 34x32            | ductal      | 3                                 | -ve                      | -ve                         | 4AC-4TX                    | responder                        | grade 5                                       | NA                                                              | no                         | no                    |
| 11          | 35  | 28.32                                      | pre                              | +ve                                | 100x82           | ductal      | 2                                 | +ve                      | -ve                         | 4AC-4T                     | responder                        | grade 4                                       | grade 3                                                         | yes                        | yes                   |
| 12          | 57  | 24.44                                      | post                             | +ve                                | 47x42            | ductal      | 3                                 | +ve                      | -ve                         | 4AC-4T                     | responder                        | grade 4                                       | grade 2                                                         | yes                        | yes                   |
| 13          | 43  | 31.56                                      | pre                              | -ve                                | 35x35            | ductal      | 3                                 | +ve                      | +ve                         | 4AC-4T                     | responder                        | grade 3                                       | NA                                                              | yes                        | no                    |
| 15          | 35  | 25.85                                      | pre                              | +ve                                | 50x40            | ductal      | 2                                 | +ve                      | -ve                         | 2AC-6TX                    | non-responder                    | grade 3                                       | grade 2                                                         | no                         | no                    |
| 17          | 61  | 23.81                                      | post                             | -ve                                | 36x21            | ductal      | 2                                 | +ve                      | +ve                         | 4AC-4T                     | responder                        | grade 5                                       | NA                                                              | no                         | no                    |
| 20          | 57  | 26.29                                      | post                             | -ve                                | 38x35            | ductal      | 2                                 | +ve                      | -ve                         | 2AC-6T                     | non-responder                    | grade 3                                       | NA                                                              | no                         | no                    |
| 21          | 48  | 30.25                                      | pre                              | +ve                                | 22x15            | ductal      | 1                                 | +ve                      | -ve                         | 4AC-4T                     | responder                        | grade 3                                       | grade 1                                                         | yes                        | no                    |
| 22          | 47  | 23.52                                      | pre                              | +ve                                | 40x40            | ductal      | 3                                 | +ve                      | -ve                         | 2AC-6TX                    | non-responder                    | grade 5                                       | grade 3                                                         | no                         | no                    |
| 29          | 54  | 25.49                                      | post                             | +ve                                | 34x27            | lobular     | 2                                 | +ve                      | -ve                         | 4AC-4TX                    | responder                        | grade 3                                       | grade 2                                                         | yes                        | no                    |
| 37          | 52  | 24.70                                      | post                             | -ve                                | 40x39            | ductal      | 1                                 | +ve                      | -ve                         | 4AC-4TX                    | responder                        | grade 3                                       | NA                                                              | no                         | no                    |
| 38          | 63  | 31.35                                      | post                             | -ve                                | 44x44            | ductal      | 3                                 | +ve                      | -ve                         | 4AC-4T                     | responder                        | grade 4                                       | NA                                                              | yes                        | yes                   |
| 40          | 50  | 26.49                                      | post                             | -ve                                | 36x32            | metaplastic | 3                                 | -ve                      | -ve                         | 4AC-4T                     | responder                        | grade 5                                       | NA                                                              | no                         | no                    |
| 41          | 51  | 32.03                                      | pre                              | -ve                                | 30x30            | ductal      | 3                                 | +ve                      | -ve                         | 4AC-4TX                    | responder                        | grade 5                                       | NA                                                              | no                         | no                    |
| 46          | 38  | 33.19                                      | pre                              | +ve                                | 39x38            | ductal      | 3                                 | -ve                      | +ve                         | 4AC-4TX                    | responder                        | grade 5                                       | grade 3                                                         | no                         | no                    |
| 63          | 37  | 20.93                                      | pre                              | +ve                                | 35x30            | ductal      | 2                                 | -ve                      | +ve                         | 4AC-4T                     | responder                        | grade 4                                       | grade 2                                                         | yes                        | no                    |
| 73          | 47  | 30.01                                      | pre                              | +ve                                | 33x33            | ductal      | 3                                 | -ve                      | +ve                         | 4AC-4TX                    | responder                        | grade 5                                       | grade 3                                                         | no                         | no                    |
| 77          | 65  | 27.63                                      | post                             | +ve                                | 20x20            | ductal      | 3                                 | -ve                      | +ve                         | 2AC-6T                     | non-responder                    | grade 1                                       | grade 2                                                         | yes                        | yes                   |
| 80          | 45  | 29.30                                      | pre                              | +ve                                | 36x31            | ductal      | 2                                 | +ve                      | -ve                         | 2AC-6T                     | non-responder                    | grade 2                                       | grade 1                                                         | yes                        | no                    |
| 82          | 67  | 28.65                                      | post                             | +ve                                | 30x30            | lobular     | 2                                 | +ve                      | -ve                         | 4AC-4TX                    | responder                        | grade 5                                       | grade 2                                                         | no                         | no                    |
| 83          | 50  | 22.37                                      | pre                              | +ve                                | 40x40            | ductal      | 3                                 | -ve                      | +ve                         | 2AC-6TX                    | non-responder                    | grade 3                                       | grade 2                                                         | no                         | no                    |
| 84          | 47  | 26.29                                      | post                             | +ve                                | 45x30            | ductal      | 2                                 | +ve                      | -ve                         | 4AC-4T                     | responder                        | grade 3                                       | grade 2                                                         | yes                        | yes                   |
| 86          | 64  | 32.37                                      | post                             | -ve                                | 40x40            | ductal      | 2                                 | +ve                      | -ve                         | 2AC-6T                     | non-responder                    | grade 2                                       | grade 2                                                         | no                         | no                    |
| 88          | 58  | 32.97                                      | post                             | +ve                                | 25x15            | ductal      | 2                                 | +ve                      | -ve                         | 2AC-6TX                    | non-responder                    | grade 4                                       | grade 1                                                         | no                         | no                    |
| 89          | 49  | 39.65                                      | pre                              | +ve                                | 25x25            | ductal      | 2                                 | +ve                      | -ve                         | 2AC-6TX                    | non-responder                    | grade 2                                       | grade 2                                                         | no                         | no                    |
| 90          | 56  | 26.01                                      | post                             | +ve                                | 30x27            | ductal      | 3                                 | +ve                      | -ve                         | 4AC-4TX                    | responder                        | grade 5                                       | grade 3                                                         | no                         | no                    |
| 96          | 51  | 25.28                                      | post                             | +ve                                | 45x45            | ductal      | 3                                 | -ve                      | -ve                         | 2AC-6T                     | non-responder                    | grade 5                                       | grade 2                                                         | yes                        | yes                   |

|     |    |       |      |     |       |        |   |     |     |         |           |         |         |    |    |
|-----|----|-------|------|-----|-------|--------|---|-----|-----|---------|-----------|---------|---------|----|----|
| 108 | 56 | 24.92 | post | +ve | 47x40 | ductal | 3 | -ve | +ve | 4AC-4TX | responder | grade 5 | grade 3 | no | no |
| 112 | 49 | 37.41 | pre  | +ve | 50x40 | ductal | 2 | +ve | -ve | 4AC-4TX | responder | grade 5 | grade 3 | no | no |
| 114 | 38 | 31.21 | pre  | +ve | 42x36 | ductal | 3 | -ve | +ve | 4AC-4T  | responder | grade 5 | grade 3 | no | no |
| 115 | 65 | 32.22 | post | +ve | 14x12 | ductal | 3 | +ve | -ve | 4AC-4T  | responder | grade 5 | grade 3 | no | no |

<sup>(1)</sup> BMI: Body mass index ( $\leq 30$ : Non-obese,  $>30$ : Obese)

<sup>(2)</sup> Menopausal status: Pre-menopausal, age  $< 55$  years with normal menstrual cycles; Post-menopausal, age  $> 50$  years with no spontaneous menses for at least one year/ or age  $\leq 50$  years with no spontaneous menses within the past 2 years/or women who had bilateral oophorectomy prior to the diagnosis of breast cancer

<sup>(3)</sup> Histological grade: Grade 1 (well differentiated), grade 2 (moderately differentiated), grade 3 (poorly differentiated)

<sup>(4)</sup> ER (oestrogen receptor): Allred scoring system was used for measuring expression of ER (score  $\geq 3$  for positive,  $< 3$  for negative)

<sup>(5)</sup> HER2 (human epidermal growth factor receptor 2): Determined by FISH (fluorescence in-situ hybridisation)

<sup>(6)</sup> A: Adriamycin (doxorubicin), C: Cyclophosphamide, T: Taxotere (docetaxel) and X: Xeloda® (capecitabine)

<sup>(7)</sup> Clinical response was assessed by MRI (magnetic resonance imaging) of breast after 2 cycles of AC using the RECIST criteria

<sup>(8)</sup> Pathological response in breast was graded as grade 1: No change or some alteration to individual malignant cells but no reduction in overall cellularity; grade 2: A minor loss of tumour cells but overall cellularity still high, up to 30 % loss; grade 3: Between an estimated 30% and 90% reduction in tumour cells; grade 4: A marked disappearance of tumour cells such that only small clusters or widely dispersed individual cells remain, more than 90% loss of tumour cells; grade 5: No malignant cells identifiable from the site of the tumour (pCR)

<sup>(9)</sup> Pathological response in axilla was graded as grade 1: Metastasis with no fibrosis; grade 2: Metastasis with variable replacement by fibrous tissue; grade 3: No malignant cells identifiable but replacement by fibrous tissue (pCR); NA (not applicable): No nodal metastasis

<sup>(10)</sup> Recurrent disease and death from a median follow-up of 51 months
